# Supplementary material
Source: publisher site journal article supplement (https://www.dovepress.com/article/390984)
Supplement: Supplementary file 1 [file get_supplementary_file.php]

Figure S1

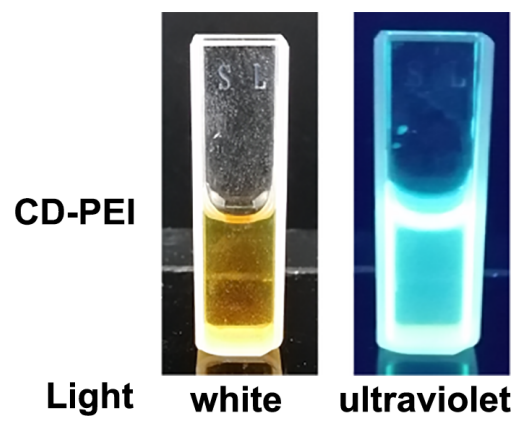

Figure S2

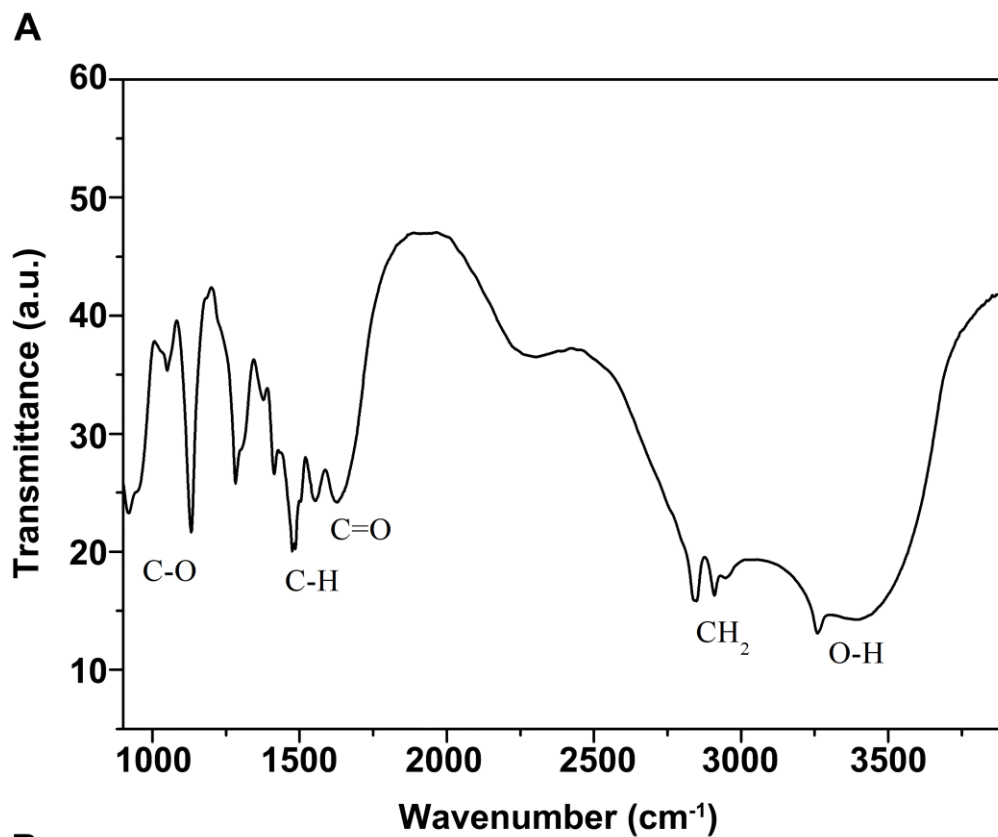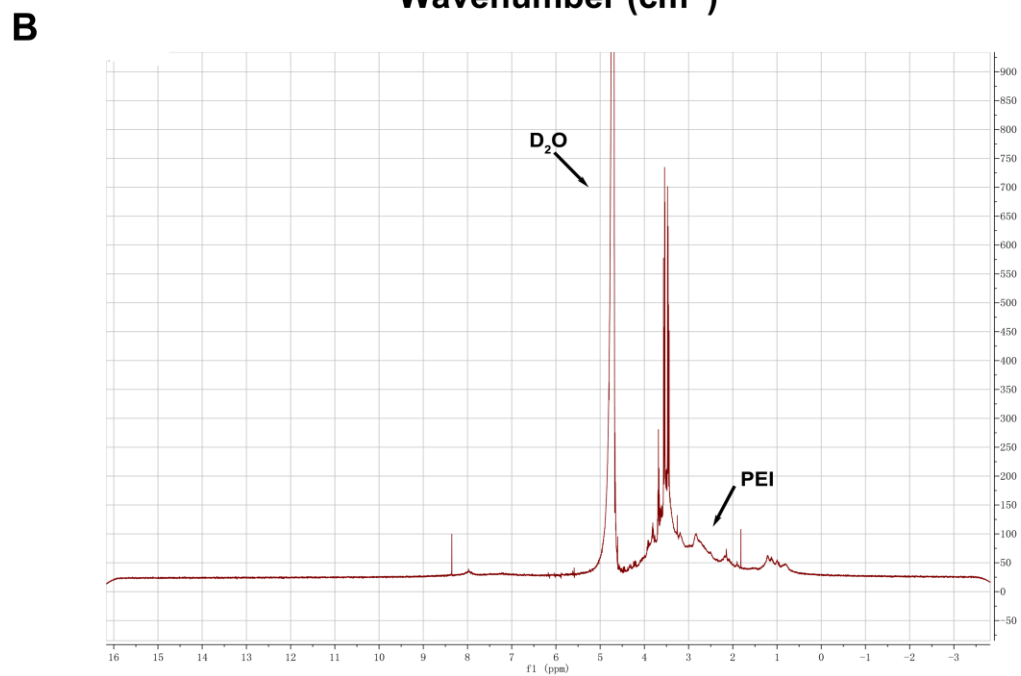

Figure S3

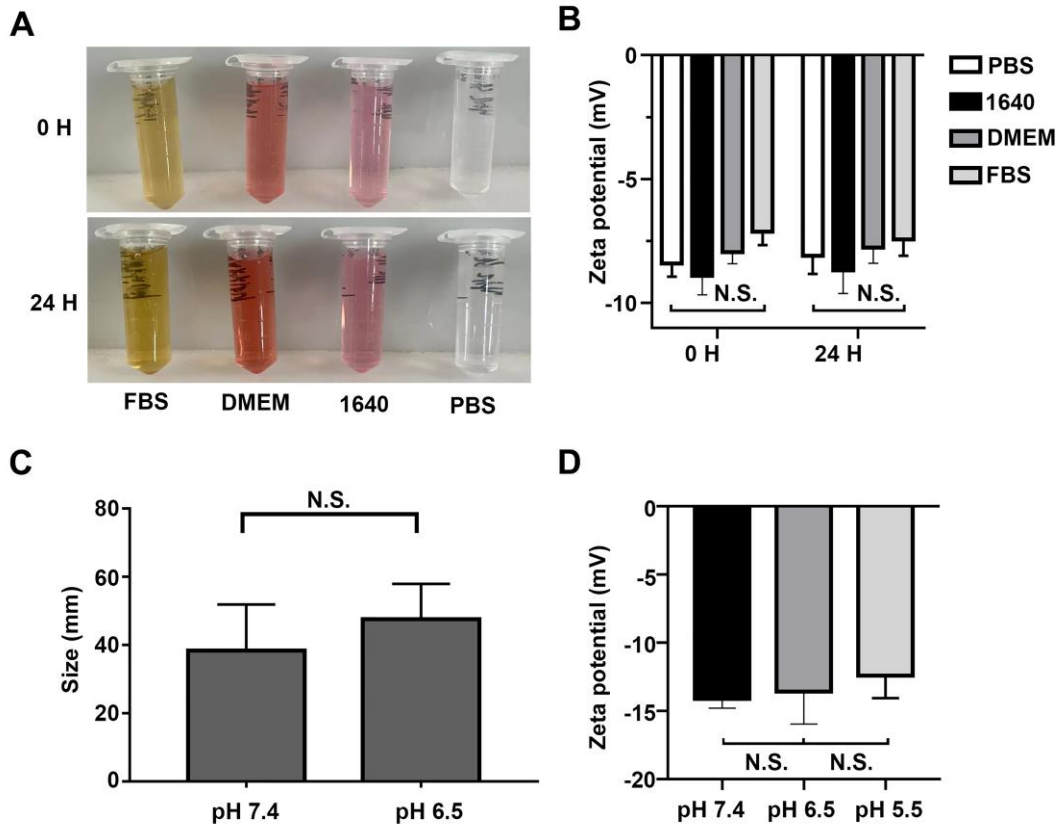

# Figure S4

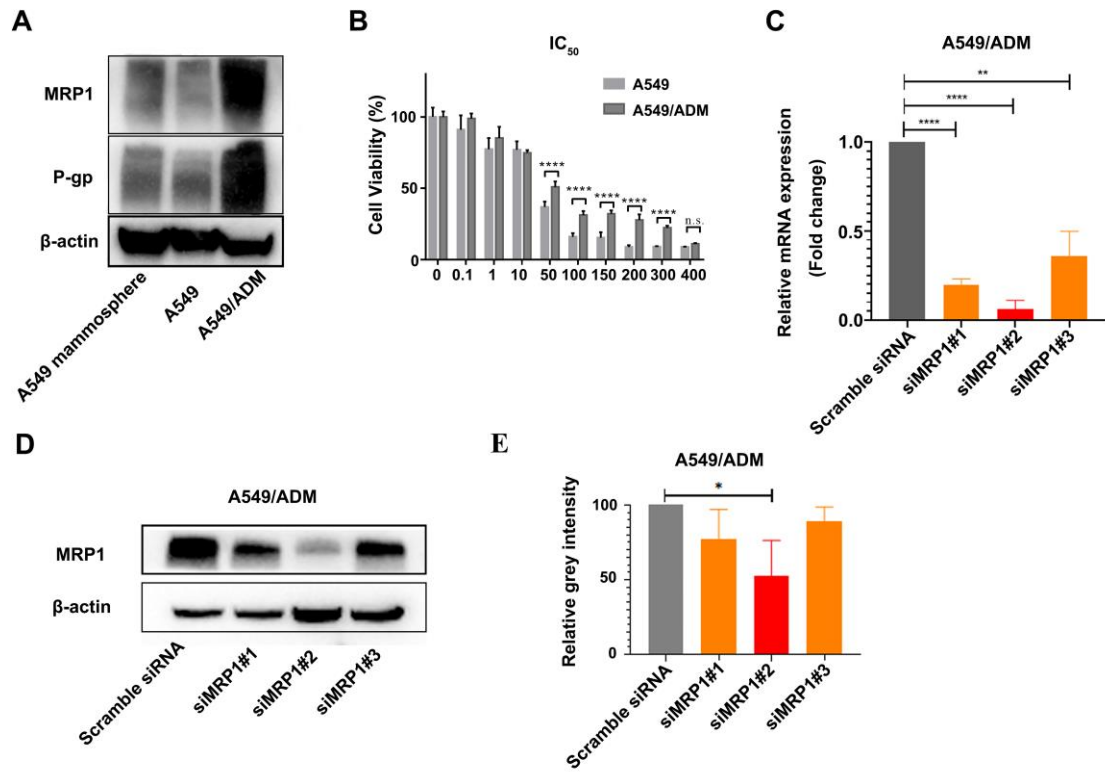

Figure S5

**A**

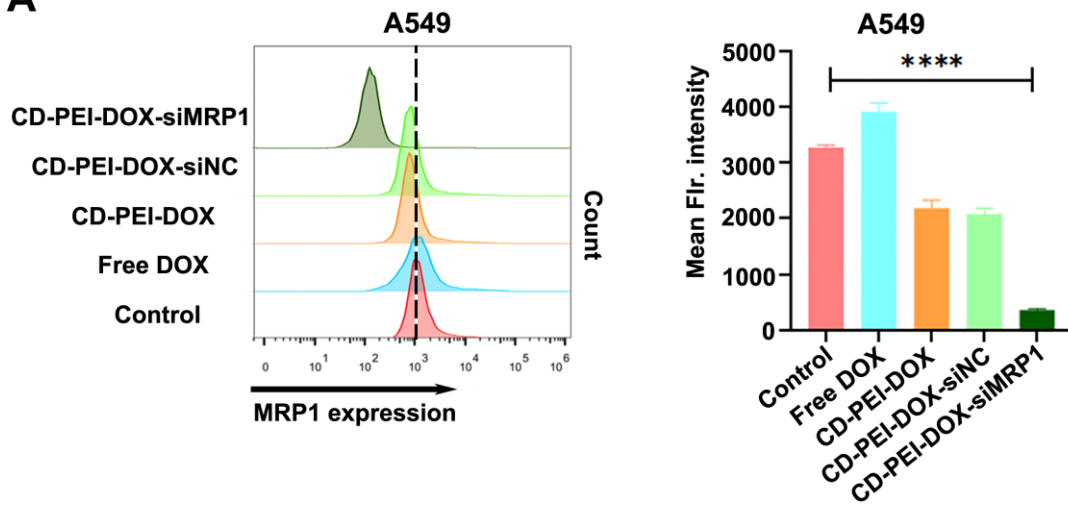

**B**

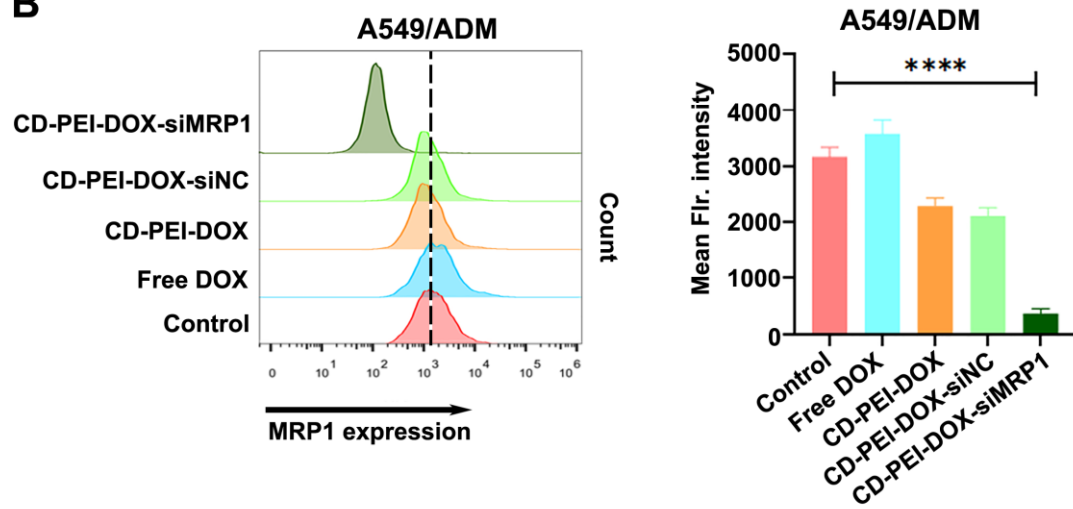

**C**

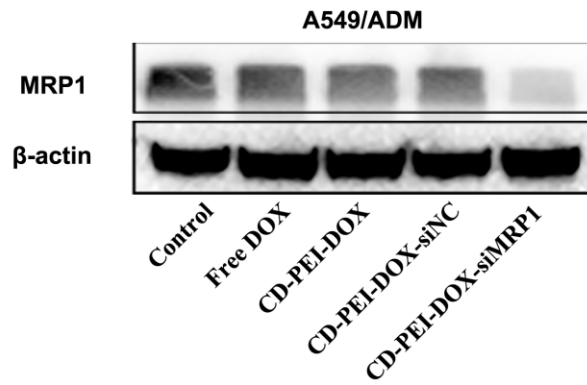

Figure S6

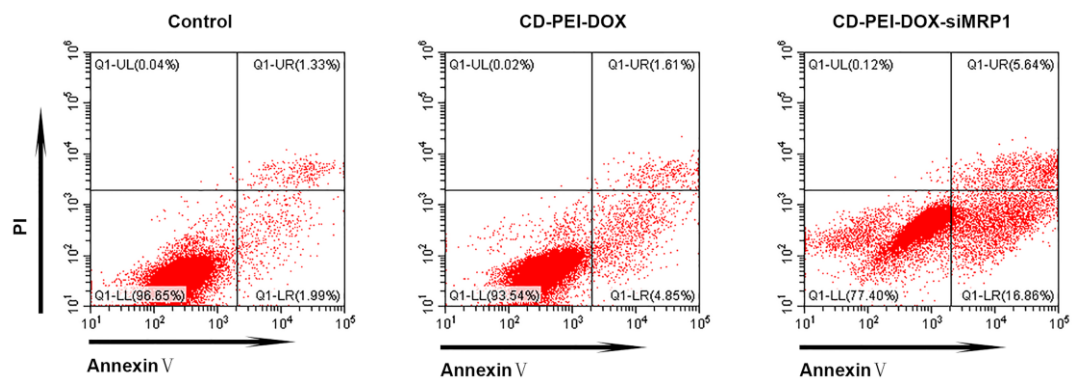

**Figure S1**

The optical images of CD-PEI under white light and UV light.

**Figure S2**

(A) The FTIR spectrum of PEI. (B) NMR analysis were conducted on CD-PEI nano particles. Characteristic peak of CD-PEI were shown in black arrow.

**Figure S3**

The stability of CD-PEI-siMRP1 were explored. (A) CD-PEI-siMRP1 were incubated with Fetal Bovine Serum (FBS), DMEM culture medium, 1640 medium and PBS control for 0 hour or 24 hour. (B) Zeta potential of CD-PEI-siMRP1 under different treatment as indicated were measured. (C) Size of CD-PEI-siMRP1 were measured after being incubated with pH 7.4 and pH 6.5 solutions. (D) Zeta-potential of CD-PEI-siMRP1 were measured after being incubated with pH 7.4, pH 6.5 and pH 7.4 solutions.

**Figure S4**

Analysis of chemoresistance of lung cancer cells against doxorubicin. (A) Expression of MRP1 and P-gp on A549, A549 mammosphere, and chemoresistant A549/ADM cells by western blot.  $\beta$ -actin was used as a loading control. (B) Cell viability was detected after treatment by indicated concentrations of doxorubicin in A549 and A549/ADM cells. \*\*\*\* indicates  $p < 0.0001$ . (C) The expression of MRP1 was detected by qPCR after knockdown by three siRNA sequences in A549/ADM cells. (D) The expression of MRP1 in A549/ADM cells was detected by western blot after knockdown by three siRNA sequences. (E) Quantification of grey intensity were calculated from each group after MRP1 knockdown in A549/ADM cells was shown.

**Figure S5**

Expression of MRP1 on lung cancer cells treated by different drugs. (A) Expression and quantification of MRP1 on A549 cells by flow cytometry. (B) Expression and quantification of MRP1 on A549/ADM cells by flow cytometry. (C) Examination of MRP1 expression after treatment with the indicated drugs in A549/ADM cells,  $\beta$ -actin was used as a loading control.

**Figure S6**

Apoptosis in CD-PEI-siMRP1 treated cells were investigated. A549/ADM cells were pre-incubated with PBS, CD-PEI-siNC or CD-PEI-siMRP1 solutions respectively. Then cells were subjected to Annexin V/PI staining. Annexin V<sup>+</sup>/PI<sup>-</sup> were considered apoptotic cells and detected by flow cytometry.
